# Supplementary material for: NIR-II light-activated two-photon squaric acid dye with Type I photodynamics for antitumor therapy
Source: publisher site journal article supplement (doi:10.1515/nanoph-2022-0482), 2022-10-22
Supplement: Supplementary file [file j_nanoph-2022-0482_suppl.pdf]

## Supporting Information

# **NIR-II Light-activated Two-photon Squaric Acid Dye with Type I Photodynamics for Antitumor Therapy**

*Kexin Wang<sup>a,#</sup>, Yunjian Xu<sup>a,#</sup>, Zhenjiang Chen<sup>a</sup>, Huixian Li<sup>a</sup>, Rui Hu<sup>a</sup>, Junle Qu<sup>a</sup>, Yuan Lu<sup>b,\*</sup> and Liwei Liu<sup>a,\*</sup>*

<sup>a</sup>Key Laboratory of Optoelectronic Devices and Systems of Guangdong Province & Ministry of Education, College of Physics and Optoelectronic Engineering Shenzhen University, Shenzhen, Guangdong Province, 518060, P. R. China

<sup>b</sup>The Sixth People's Hospital of Shenzhen, Shenzhen 518052, China

\*E-mail: liulw@szu.edu.cn; chfsums@163.com

#These authors contributed equally to this work.

## ***Contents***

### **Part I. Supplementary Tables and Figures**

## Part I. Supplementary Tables and Figures

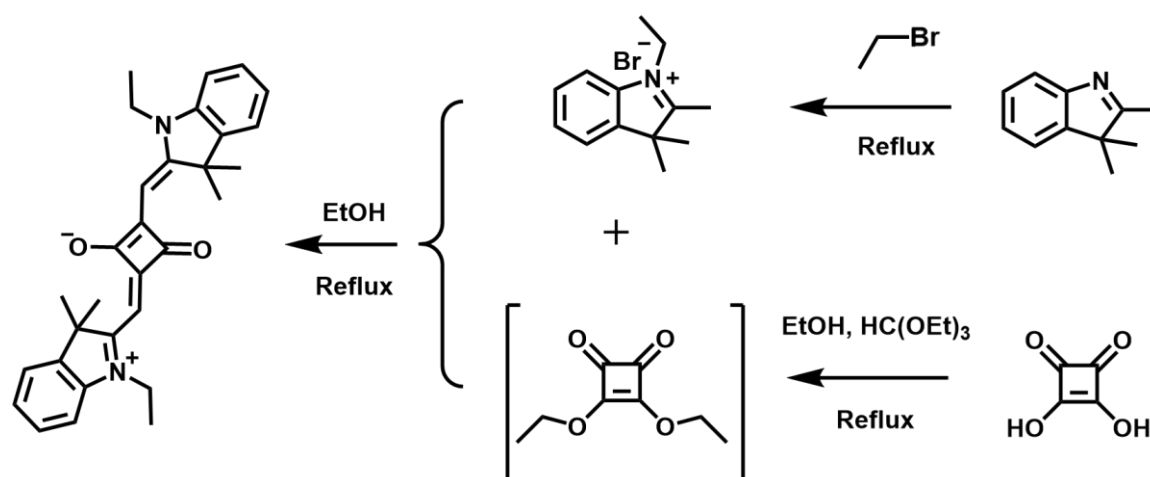

**Scheme S1.** The synthetic route to compound **SQ Dye**.

<sup>1</sup>H NMR of SQ dye: (500 MHz, DMSO-d<sub>6</sub>)  $\delta$  7.53 (d,  $J$  = 7.0 Hz, 1H), 7.40 (d,  $J$  = 7.0 Hz, 1H), 7.37-7.31 (m, 2H), 7.26 (t,  $J$  = 7.0 Hz, 1H), 7.11 (d,  $J$  = 7.5 Hz, 1H), 7.02 (t,  $J$  = 7.5 Hz, 1H), 5.79 (s, 1H), 5.52 (s, 1H), 4.13 (q,  $J$  = 13.5 Hz, 2H), 3.91 (q,  $J$  = 13.5 Hz, 2H), 1.68 (s, 6H), 1.54 (s, 6H), 1.28 (t,  $J$  = 7.0 Hz, 3H), 1.23 (t,  $J$  = 6.0 Hz, 3H).

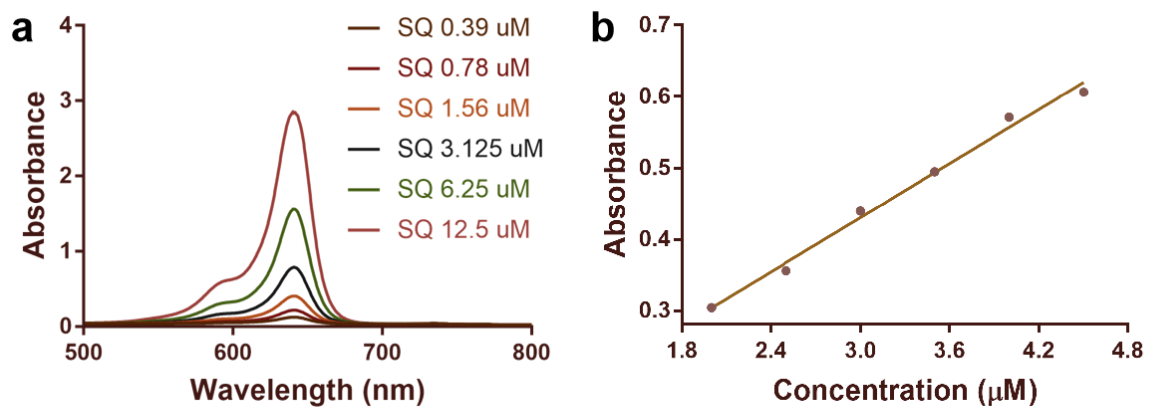

**Fig. S1:** (a) Absorption spectra of **SQ** in DMSO with different concentrations. (b) Concentrations-dependent maximal absorbance of **SQ** in DMSO ( $\lambda_{Ex} = 635$  nm).

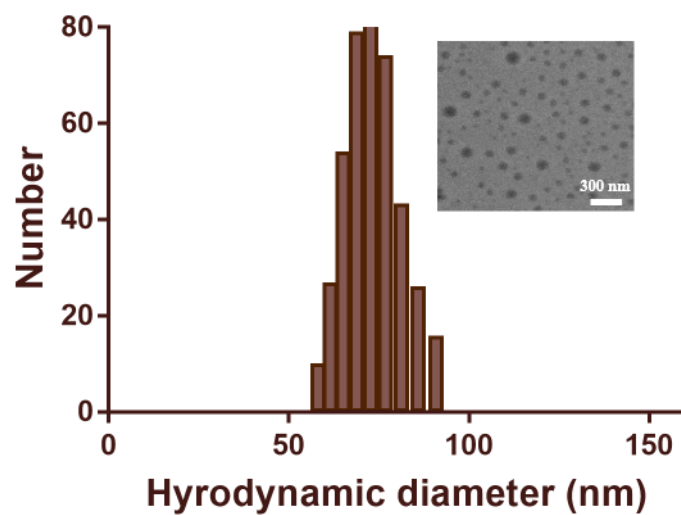

**Fig. S2:** DLS of **SQ NPs** in PBS (pH = 7.4). Inset was TEM images of **SQ NPs**.

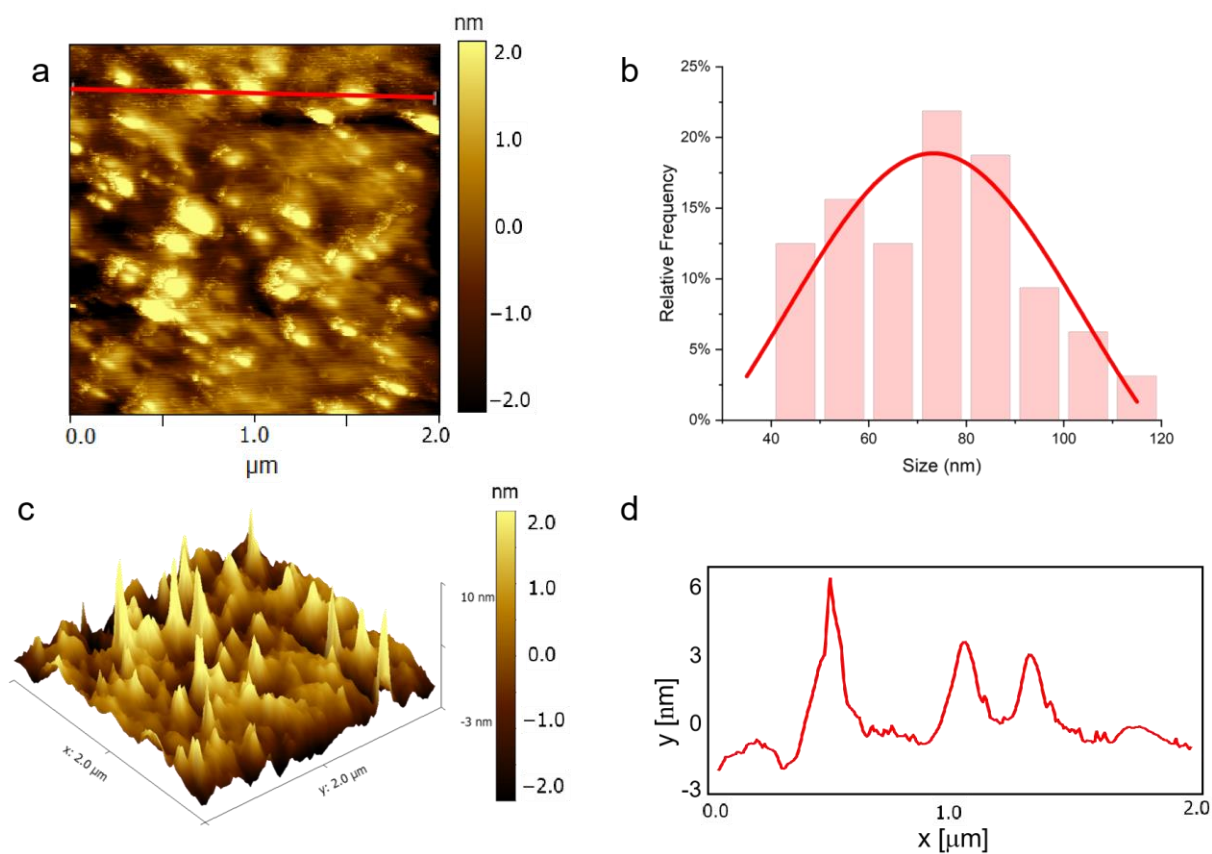

**Fig. S3:** Basic characterization of SQ NPs. (a) The AFM images. (b) Size distribution obtained from AFM images. (c) 3D image. (d) The corresponding height profiles along the red lines in (a).

**Table S1:** Photophysical and photochemical properties of **samples**.

| Samples                      | Abs. (nm) | $\epsilon$ (L mol <sup>-1</sup> cm) | E <sub>m</sub> . (nm) |
|------------------------------|-----------|-------------------------------------|-----------------------|
| SQ NPs<br>(H <sub>2</sub> O) | 635       | 134800                              | 664                   |
| SQ (DMSO)                    | 641       | 146433                              | 660                   |
| SQ (H <sub>2</sub> O)        | 618       | 41441                               | 648                   |

**Table S2:** Performance Comparison of **SQ NPs**, Other Nanomaterials and Photosensitizers.

| Samples           | Preparation steps                                                                                                                                                                                                                                                                                                                                                                      | Penetration depth | Tumor inhibition rate | Ref. |
|-------------------|----------------------------------------------------------------------------------------------------------------------------------------------------------------------------------------------------------------------------------------------------------------------------------------------------------------------------------------------------------------------------------------|-------------------|-----------------------|------|
| <b>SQ NPs</b>     | BSA+SQ $\xrightarrow{\text{electrostatic adsorption}}$ SQ NPs                                                                                                                                                                                                                                                                                                                          | 1150 nm           | 85%                   |      |
| <b>ZrC NSs</b>    | $\text{ZrC} \xrightarrow{\text{probe sonicate + bath sonicate}} \text{ZrC-NS}$<br>$\text{Niflumic acid+EDC}\cdot\text{HCl+DMAP+SN38} \xrightarrow{\text{stirring + drying}} \text{SN38 Nif}$<br>$2 \text{ PEG-NH}_2+\text{ZrC NSs} \xrightarrow{\text{electrostatic adsorption}} \text{PEG-ZrC}$<br>$\text{ZrC-PEG-NH}_2+\text{SN38 Nif} \xrightarrow{\text{stirring}} \text{ZrC NSs}$ | 1064 nm           | 75%                   | [1]  |
| <b>BPNSs</b>      | $\text{BPPNs} \xrightarrow{\text{centrifugation + drying}} \text{BPPNs}$<br>$\text{BPPNs+PEG-NH}_2 \xrightarrow{\text{centrifugation + resuspension}} \text{BPNSs}$                                                                                                                                                                                                                    | 808 nm            | 25%                   | [2]  |
| <b>PDA@CP-PEG</b> | $\text{PDA} \xrightarrow{\text{soaking + drying}} \text{PDA@CP}$<br>$\text{PDA@CP+PEG-NHS-PDA} \xrightarrow{\text{centrifugation + drying}} \text{PDA@CP-PEG}$                                                                                                                                                                                                                         | 808 nm            | 80%                   | [3]  |

The tumor inhibition rate is calculated by the follow equation:

tumor inhibition rate = (the tumor volume in treatment group/the tumor volume in control group)\*100%.



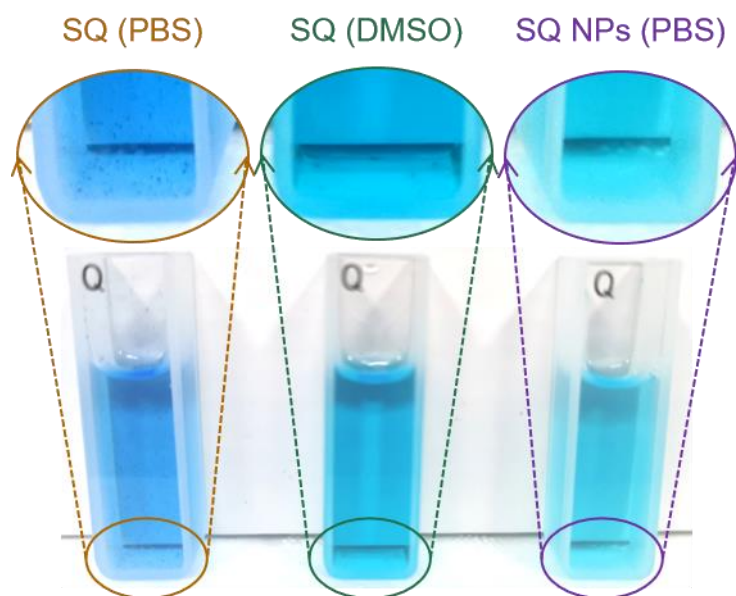

**Fig. S4:** Representative photographs of **SQ dye**. Inset is a zoomed-in photograph of the portion in the cuvette.

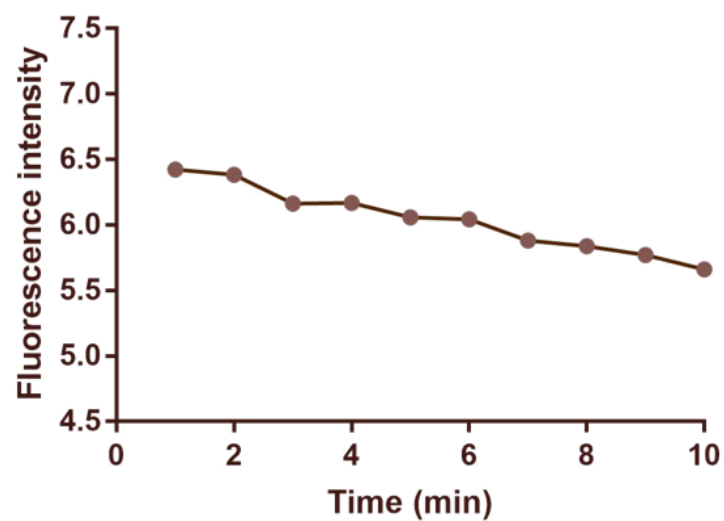

**Fig. S5:** Intracellular photobleaching resistance of **SQ NPs** with irradiation (100 mW  $\text{cm}^{-2}$ , 1150 nm) in different times, respectively.

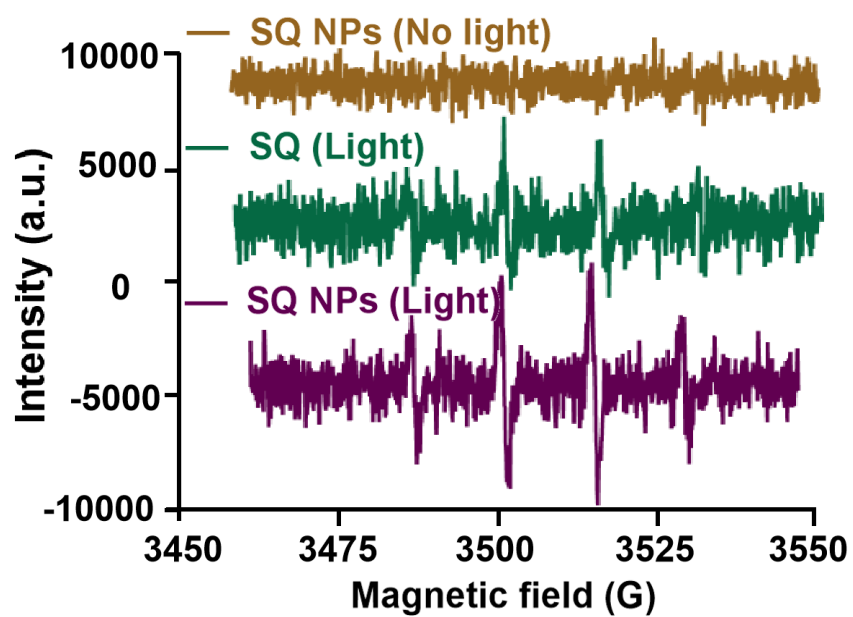

**Fig. S6:** DMPO spin-trapping ESR spectra recorded with SQ and SQ NPs in H<sub>2</sub>O dispersion (for DMPO- $\bullet$ OH) under hypoxic conditions.

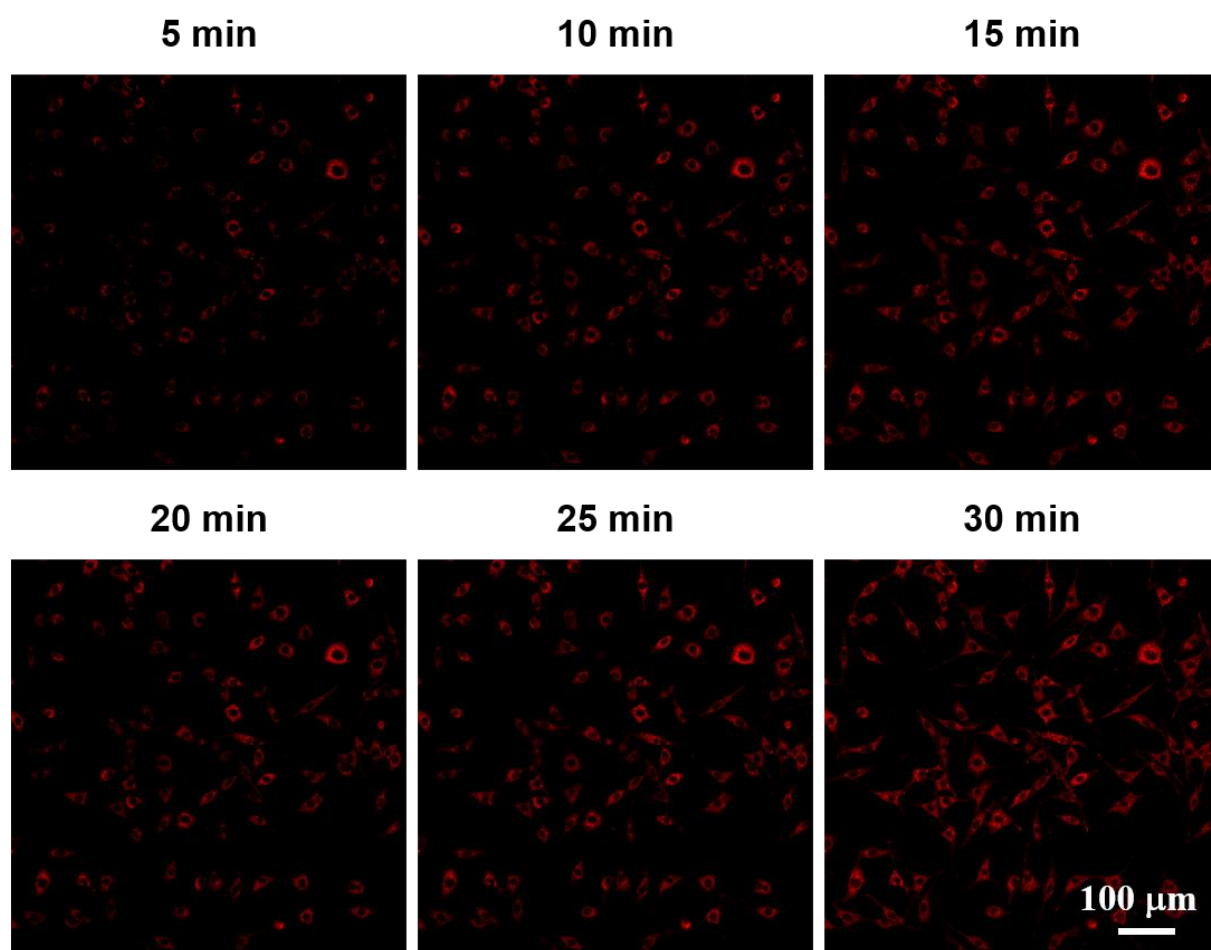

**Fig. S7:** Cellular uptake of **SQ NPs**. SH-SY5Y cells were incubated with **SQ NPs** at different times under normoxic conditions, respectively.

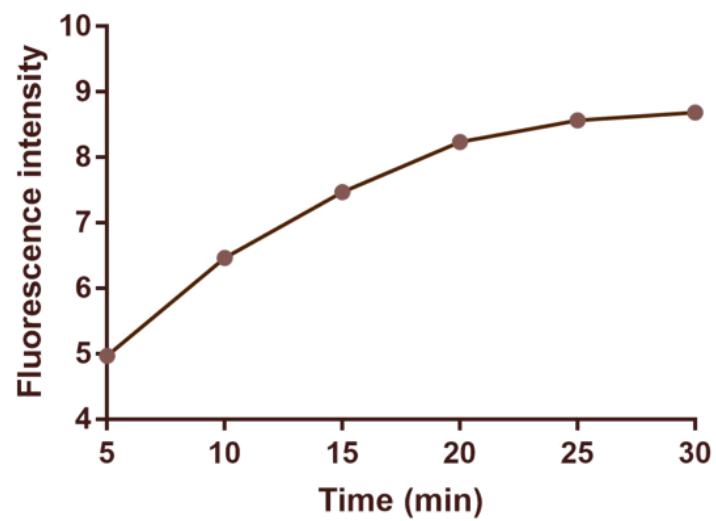

**Fig. S8:** The intracellular fluorescence intensity of **SQ NPs**.

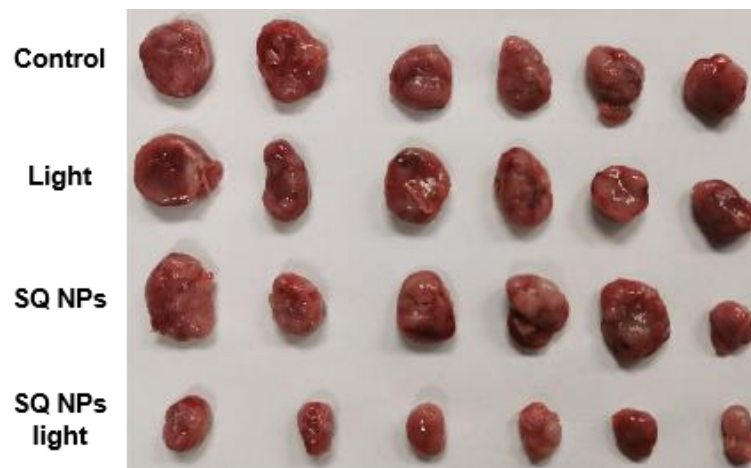

**Fig. S9:** Photographic image of tumors harvested from mice at 16 days after different treatments.

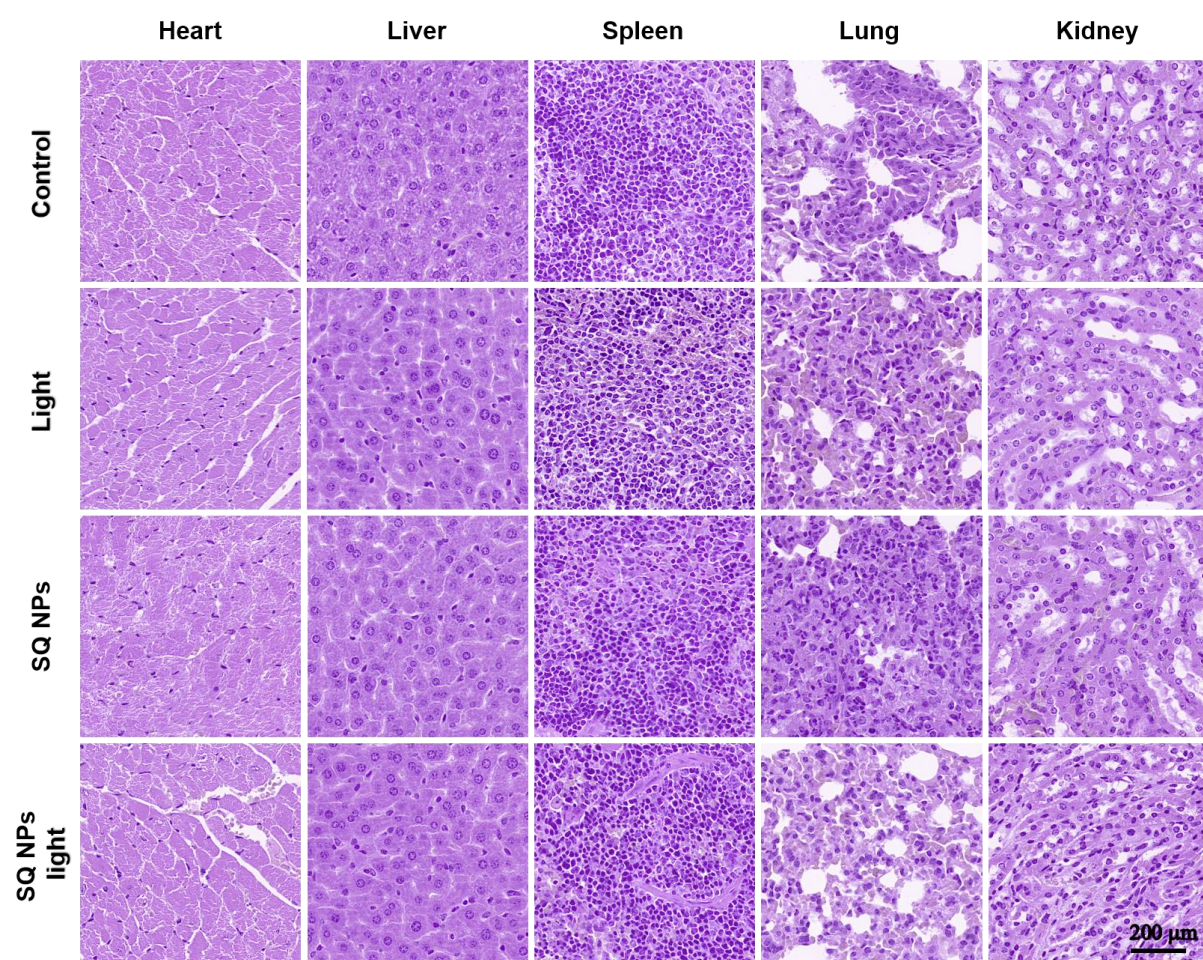

**Fig. S10:** Histological analysis of hematoxylin-eosin staining of heart, liver, spleen, lung, and kidney tissue obtained from tumor-bearing mice in each group. The scale is 200  $\mu\text{m}$ .



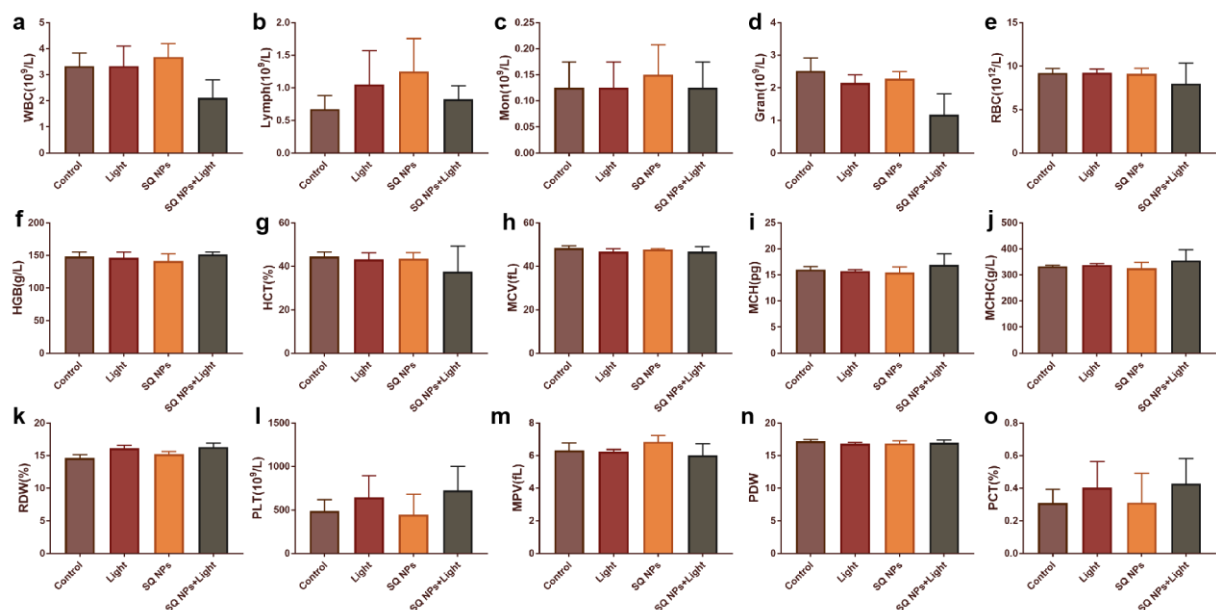

**Fig. S11:** Hematological analysis for mice in different groups 16 days post-therapy. Data represent means  $\pm$  SD from three independent replicates. SD is denoted by the error bars.



## References

- [1] Q. Liu, Z. Xie, M. Qiu, I. Shim, Y. Yang, S. Xie, et al. "Prodrug-Loaded Zirconium Carbide Nanosheets as a Novel Biophotonic Nanoplatfrom for Effective Treatment of Cancer" *Adv Sci.* vol. 7, no. 24, pp. 2001191, 2020. <https://doi.org/10.1002/adv.202001191>
- [2] M. Wang, J. Zhu, Y. Zi, Z.-G. Wu, H. Hu, Z. Xie, et al. "Functional Two-Dimensional Black Phosphorus Nanostructures Towards Next-Generation Devices" *J Mater Chem A.* vol. 9, no. 21, pp. 12433-12353, 2021. <https://doi.org/10.1039/d1ta02027g>.
- [3] S. Liu, J. Pan, J. Liu, Y. Ma, F. Qiu, L. Mei, et al. "Dynamically PEGylated and Borate-Coordination-Polymer-Coated Polydopamine Nanoparticles for Synergetic Tumor-Targeted, Chemo-Photothermal Combination Therapy." *Small*, vol. 14, no. 13, 2018. <https://doi.org/10.1002/smll.201703968>.
